# Supplementary material for: Oxidized Dietary Oil, High in Omega-3 and Omega-6 Polyunsaturated Fatty Acids, Induces Antioxidant Responses in a Human Intestinal HT29 Cell Line
Source: MDPI journal article supplement (doi:10.3390/nu14245341), 2022-12-15
Supplement: s1 [file s1]

**Table S1.** Primer information for quantitative PCR.

| Gene  | Primer name     | Genbank accession no. | (5'-3')                   |
|-------|-----------------|-----------------------|---------------------------|
| EF1A  | Hsa 25-ef1a-F1  | NM_001402.5           | GACACGTAGATTCTGGGCAAGTCCA |
|       | Hsa 26-ef1a-R1  |                       | CCATCTCAGCAGCCTCCTTCTCAA  |
| RPOL2 | Has 31-rpol2-F2 | NM_000937.4           | GCGCAATGAGCAGAACGGCG      |
|       | Has 32-rpol2-R2 |                       | ACTTCTGCATGGCACGGGGC      |
| GAPDH | Hs33-gapdh-F1   | NM_002046.3           | ATCCCATCACCATCTTCCAGGAGC  |
|       | Hs34-gapdh-R1   |                       | AAATGAGCCCCAGCCTTCTCCAT   |
| SOD1  | Hsa95 sod1 F2   | NM_000454             | GGAAGTCGTTTGGCTTGTGG      |
|       | Hsa96 sod1 R2   |                       | GGGCCTCAGACTACATCCAAG     |
| SOD2  | Hsa97 sod2 F1   | NM_000636.            | ACCACGATCGTTATGCTGAGT     |
|       | Hsa98 sod2 R1   |                       | TGACTAAGCAACATCAAGAAATGCT |
| SOD3  | Hsa89 sod3 F1   | NM_003102             | CTCTGAGGTCTCACCTTCGC      |
|       | Hsa90 sod3 R1   |                       | AAGGATGGTGGGTCTCGGTA      |
| CAT   | Hsa101 cat F2   | NM_001752             | ACTTCTGGAGCCTACGTCCT      |
|       | Hsa102 cat R2   |                       | TCTGGAATCCCCCGATCACT      |
| XBP1  | Hsa 1-XBP1-F1   | NM_005080             | GCGGAAGCCAAGGGGAATGAAGT   |
|       | Hsa 2-XBP1-R1   |                       | GCACGTAGTCTGAGTGCTGCGG    |
| ATF6  | Hsa 7-atf6-F2   | NM_004381             | TGGGGTCTGCAGAACAGCACCT    |
|       | Hsa -8atf6R2    |                       | CCTGCTCCGGGCAACGGAAG      |
| NFKB  | Hsa 13-nfkb-F1  | NM_03998              | GAGGAAGAAAATGGTGGAGTCTGGG |
|       | Hsa 14-nfkb-R1  |                       | TCCTCCGAAGCTGGACAAACACA   |
| GPX2  | Hsa 19-gpx2-F2  | NM_002083             | GGGGCTCACTCTGCGCTTCA      |
|       | Has 20-gpx2-R2  |                       | GCCCTGCCCCGGAACGTATT      |

**Table S2.** Relative expression level of genes involved in antioxidant response and ER stress in HT29 cells cultured in increasing concentrations of HHE and HNE for 6 hours. Data (n=4) are means shown with standard error mean. Significant differences are indicated with different letters evaluated with Tukey-HSD (p<0.05).

|                    | Control |   |     |    | HHE    |       |        |       |         |       |         |       | HNE    |       |        |       |         |       |         |       |
|--------------------|---------|---|-----|----|--------|-------|--------|-------|---------|-------|---------|-------|--------|-------|--------|-------|---------|-------|---------|-------|
|                    |         |   |     |    | 3.1 nM |       | 9.2 nM |       | 27.6 nM |       | 82.9 nM |       | 2.2 nM |       | 6.7 nM |       | 20.2 nM |       | 60.6 nM |       |
| <b><i>SOD1</i></b> | 0.0     | ± | 0.1 |    | 0.1    | ± 0.1 | 0.1    | ± 0.1 | -0.3    | ± 0.2 | 0.0     | ± 0.2 | -0.2   | ± 0.2 | 0.0    | ± 0.2 | -0.2    | ± 0.2 | -0.3    | ± 0.1 |
| <b><i>SOD2</i></b> | 0.0     | ± | 0.1 | a  | -0.4   | ± 0.1 | -0.1   | ± 0.1 | -0.5    | ± 0.2 | -0.4    | ± 0.1 | -0.4   | ± 0.1 | -0.4   | ± 0.2 | -0.4    | ± 0.2 | -1.2    | ± 0.1 |
| <b><i>SOD3</i></b> | 0.0     | ± | 0.3 |    | 0.0    | ± 0.3 | 0.3    | ± 0.2 | -0.3    | ± 0.3 | 0.0     | ± 0.1 | -0.1   | ± 0.3 | -0.2   | ± 0.2 | -0.1    | ± 0.4 | -0.8    | ± 0.3 |
| <b><i>GPX</i></b>  | 0.0     | ± | 0.1 |    | -0.2   | ± 0.1 | 0.2    | ± 0.1 | 0.2     | ± 0.1 | 0.1     | ± 0.1 | 0.2    | ± 0.1 | 0.2    | ± 0.1 | 0.2     | ± 0.2 | 0.0     | ± 0.1 |
| <b><i>CAT</i></b>  | 0.0     | ± | 0.1 |    | -0.2   | ± 0.1 | 0.0    | ± 0.1 | -0.3    | ± 0.1 | -0.2    | ± 0.1 | -0.2   | ± 0.1 | -0.2   | ± 0.1 | -0.1    | ± 0.1 | -0.3    | ± 0.1 |
| <b><i>ATF6</i></b> | 0.0     | ± | 0.1 | ab | 0.0    | ± 0.1 | 0.2    | ± 0.1 | -0.1    | ± 0.1 | -0.4    | ± 0.1 | -0.1   | ± 0.1 | 0.0    | ± 0.1 | 0.3     | ± 0.1 | -0.3    | ± 0.1 |
| <b><i>XPB1</i></b> | 0.0     | ± | 0.0 |    | -0.3   | ± 0.1 | 0.1    | ± 0.0 | -0.3    | ± 0.1 | -0.2    | ± 0.1 | -0.2   | ± 0.1 | -0.2   | ± 0.1 | -0.1    | ± 0.1 | -0.3    | ± 0.1 |

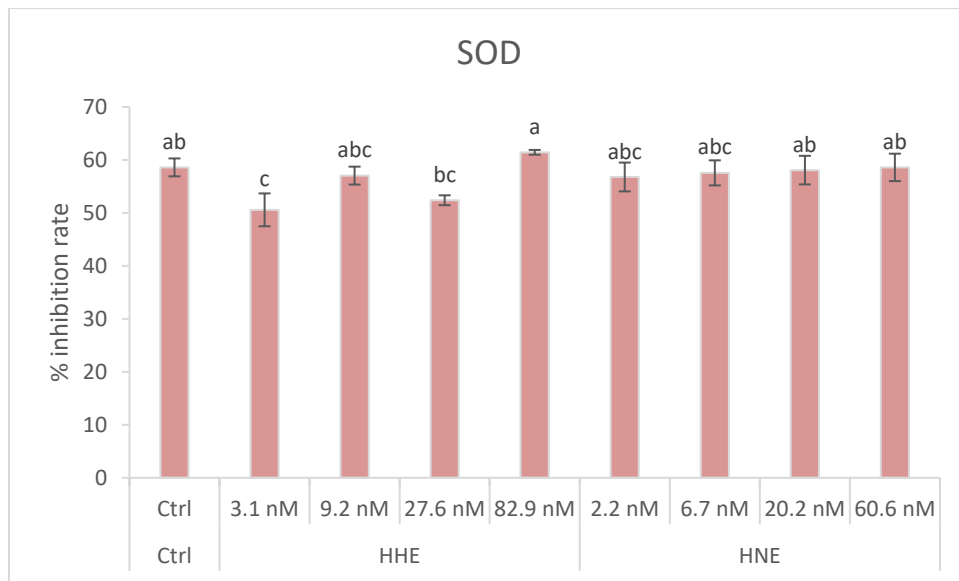

**Figure S1. Activity of SOD (% inhibition rate) in HT29 cells exposed to increasing concentrations of HHE and HNE.** All groups, except the Control group (Ctrl), were cultured in growth media containing 3.1, 9.2, 27.6 or 82.9 nM HHE or 2.2, 6.7, 20.2 or 60.6 nM HNE for 48 hours. Data (n=4) are means shown with standard error mean. Significant differences are indicated with different letters evaluated with Tukey-HSD ( $p < 0.05$ ).
